# Supplementary material for: The Clinical Significance of Forkhead Box M1 in Esophageal Squamous Cell Carcinoma Tissues: A Study Based on In-house Immunohistochemistry, RNA-sequencing, and Data Mining
Source: Research Square preprint supplement (doi:10.21203/rs.3.rs-1199894/v1), 2022-01-06
Supplement: Supplementary file 1 [file 2fa0445a627ca62acf39e059.pdf]

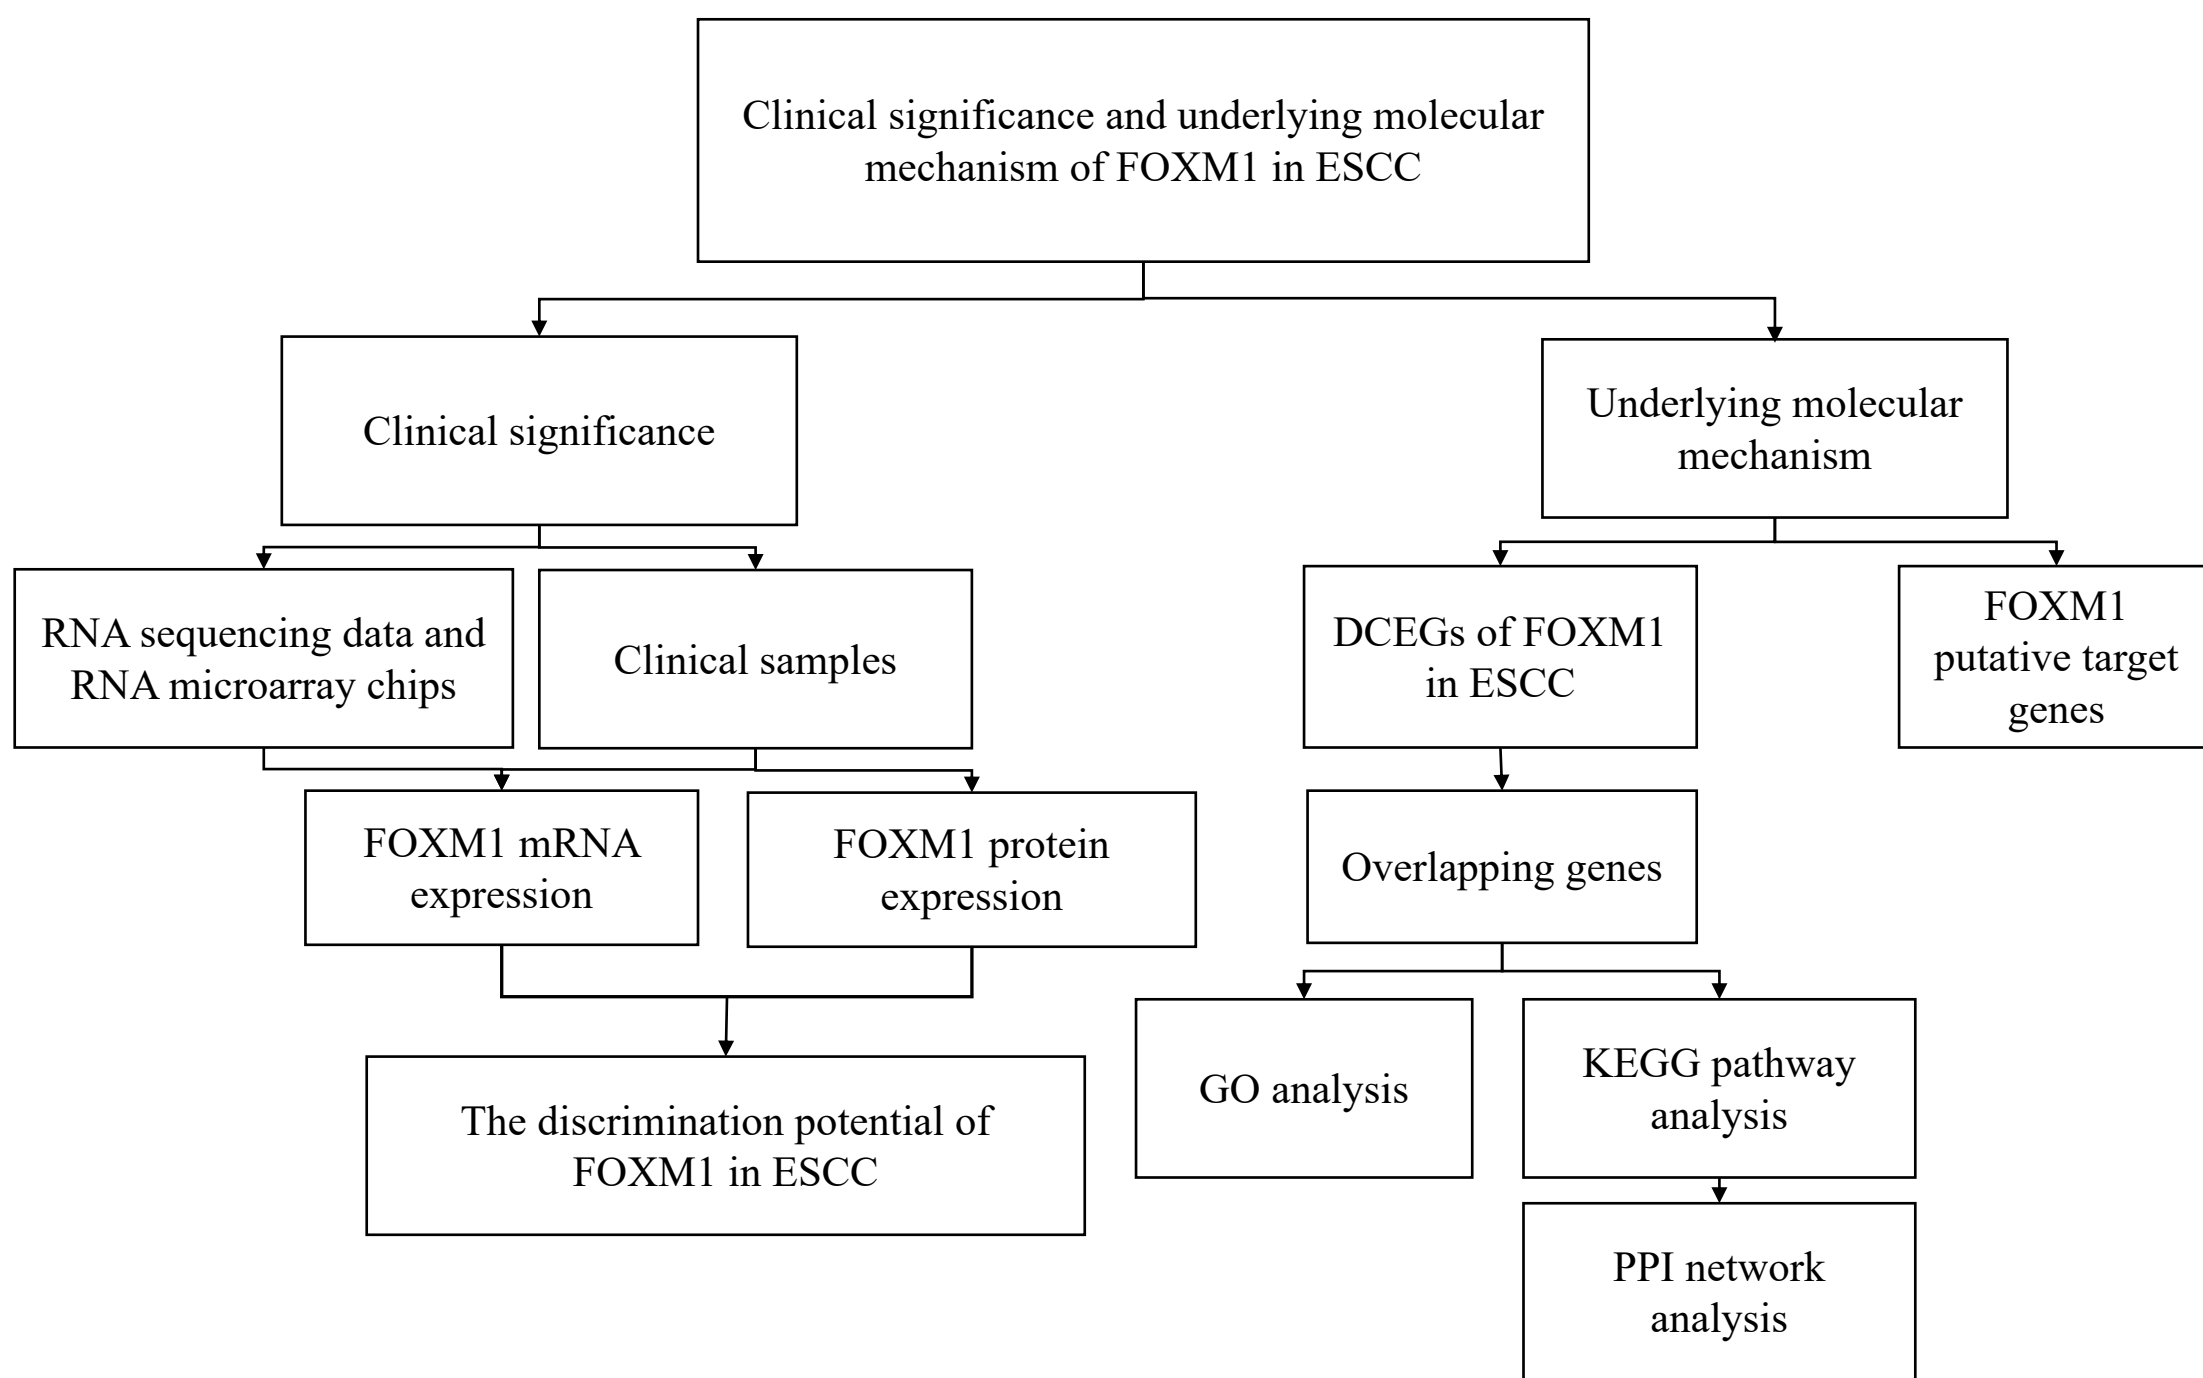

**Supplemental Figure 1 The research flow of the present study.** FOXM1, forkhead box M1; ESCC, esophageal squamous cell carcinoma; DCEGs, differentially differentially co-expressed genes; GO, gene ontology; KEGG, Kyoto Encyclopedia of Genes and Genomes; PPI, protein–protein interaction.
