# Supplementary material for: The Clinical Significance of Forkhead Box M1 in Esophageal Squamous Cell Carcinoma Tissues: A Study Based on In-house Immunohistochemistry, RNA-sequencing, and Data Mining
Source: Research Square preprint supplement (doi:10.21203/rs.3.rs-1199894/v1), 2022-01-06
Supplement: Supplementary file 2 [file 3249b018be16b4da0bf7b99a.pdf]

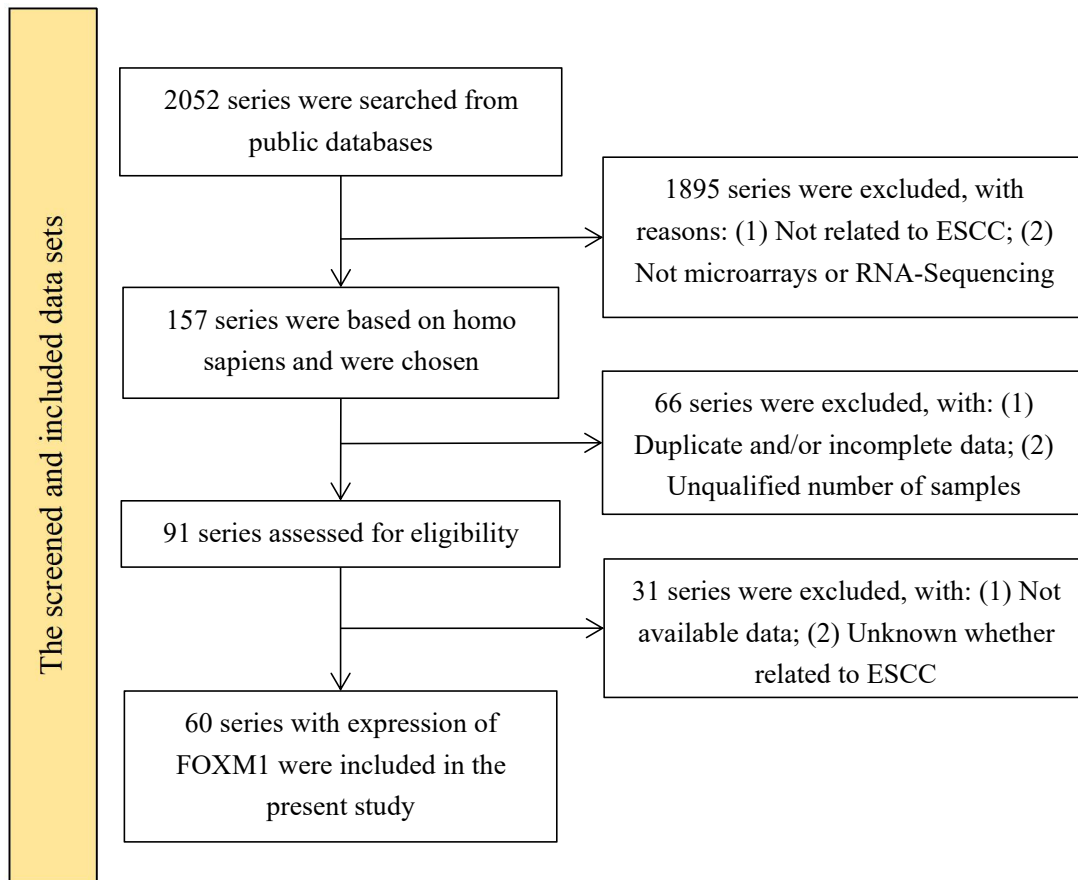

**Supplementary figure 2. A flow chart of the filtering process for the series. Data of FOXM1 expression in esophageal squamous cell carcinoma from public databases were screened according to appropriate search terms. FOXM1, Forkhead box M1.**
